# Supplementary material for: High performance graphene-based foam fabricated by a facile approach for oil absorption
Source: Royal Society of Chemistry journal article supplement (doi:10.1039/c7ta02613g), 2017-01-01
Supplement: c7ta02613g1.pdf [file c7ta02613g1.pdf]

## Electronic Supplementary Information

### High performance graphene-based foam fabricated by a facile approach for oil absorption

Cuihong Ji<sup>a</sup>, Ke Zhang<sup>c</sup>, Le Li<sup>b</sup>, Xiaoxia Chen<sup>b</sup>, Jinlong Hu<sup>d</sup>, Deyue Yan<sup>b</sup>, Guyu Xiao<sup>b\*</sup> and Xiaohua He<sup>a\*</sup>

<sup>a</sup> Department of Chemistry, School of Chemistry and Molecular Engineering, East China Normal University, 500 Dongchuan Road, Shanghai 200241, P.R. China

<sup>b</sup> School of Chemistry and Chemical Engineering, State Key Laboratory of Metal Matrix Composites, Shanghai Jiao Tong University, 800 Dongchuan Road, Shanghai 200240, P.R. China

<sup>c</sup> School of Materials Science and Engineering, University of Shanghai for Science and Technology, 516 Jungong Road, Shanghai, 200093, P.R. China

<sup>d</sup> College of Chemistry and Chemical Engineering, Hunan University, 2 south Lushan Road, Changsha, 410082, P.R. China

**Fig. S1** Video snapshots of the absorption process of a drop of *n*-heptane on the surface of M/G/CS

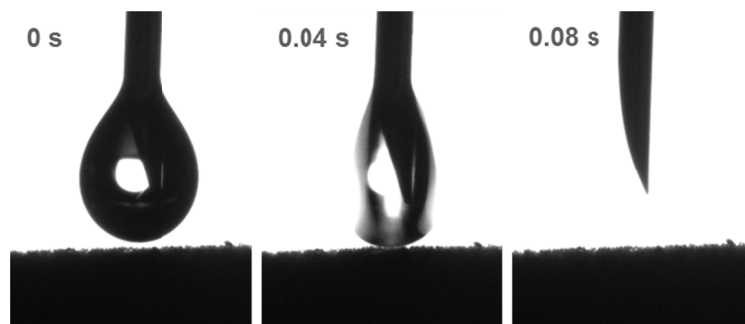

\* Corresponding authors. Tel: + 86 21 54742664, E-mail: gyxiao@sjtu.edu.cn (G. Xiao); + 86 21 54340060, E-mail: xhhe@chem.ecnu.edu.cn (X. He).

**Fig. S2** FT-IR spectra of the absorbed oils.

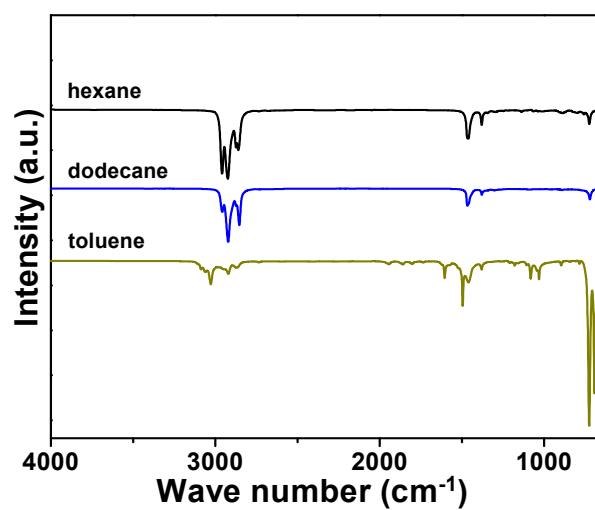

**Table S1** Element contents and C/O ratios of rGO, N330, MS, and M/G/CS.

|        | C<br>(mol.%) | O<br>(mol.%) | N<br>(mol.%) | C/O<br>(mol./mol.) |
|--------|--------------|--------------|--------------|--------------------|
| rGO    | 81.7         | 18.3         | –            | 4.47               |
| N330   | 97.9         | 2.09         | –            | 46.8               |
| MS     | 60.9         | 12.4         | 26.7         | 4.91               |
| M/G/CS | 90.1         | 5.58         | 4.29         | 16.1               |
